# Supplementary material for: Nusinersen Modulates Proteomics Profiles of Cerebrospinal Fluid in Spinal Muscular Atrophy Type 1 Patients
Source: MDPI journal article supplement (doi:10.3390/ijms22094329), 2021-04-21
Supplement: s1 [file s1]

**Supplementary Table S1:** Significant protein-spot differences detected in Ctrl vs T0, Ctrl vs T1 and T1 vs T0 comparisons according to statistics (Kruskal Wallis test =  $p \leq 0.05$ ) and sample ratio  $\geq 2$ .

| Spot number | Ctrl spot mean %Vol $\pm$ SD | T0 spot mean %Vol $\pm$ SD | T1 spot mean %Vol $\pm$ SD |
|-------------|------------------------------|----------------------------|----------------------------|
| 1           | 194 $\pm$ 129*               | 210 $\pm$ 100§             | 21 $\pm$ 23 *§             |
| 2           | 97 $\pm$ 68                  | 122 $\pm$ 53§              | 59 $\pm$ 35§               |
| 3           | 97 $\pm$ 61                  | 0                          | 38 $\pm$ 18                |
| 4           | 166 $\pm$ 57#*               | 52 $\pm$ 57#               | 39 $\pm$ 10*               |
| 5           | 104 $\pm$ 105                | 0                          | 0                          |
| 6           | 50 $\pm$ 30                  | 117 $\pm$ 91§              | 53 $\pm$ 23§               |
| 7           | 301 $\pm$ 209                | 0                          | 0                          |
| 8           | 173 $\pm$ 72*                | 125 $\pm$ 61               | 71 $\pm$ 35*               |
| 9           | 567 $\pm$ 241#*              | 147 $\pm$ 114#             | 199 $\pm$ 138*             |
| 10          | 105 $\pm$ 88                 | 0                          | 72 $\pm$ 44                |
| 11          | 143 $\pm$ 27#*               | 66 $\pm$ 31#               | 58 $\pm$ 40*               |
| 12          | 42 $\pm$ 34                  | 0                          | 0                          |
| 13          | 89 $\pm$ 85                  | 163 $\pm$ 115              | 0                          |
| 14          | 131 $\pm$ 96                 | 185 $\pm$ 102§             | 45 $\pm$ 30§               |
| 15          | 0                            | 71 $\pm$ 30                | 112 $\pm$ 102              |
| 16          | 152 $\pm$ 96                 | 185 $\pm$ 102§             | 44 $\pm$ 37§               |
| 17          | 120 $\pm$ 49#*               | 257 $\pm$ 106#             | 254 $\pm$ 148*             |
| 18          | 61 $\pm$ 26                  | 73 $\pm$ 37§               | 25 $\pm$ 17§               |
| 19          | 506 $\pm$ 191#*              | 214 $\pm$ 149#             | 242 $\pm$ 128*             |
| 20          | 278 $\pm$ 331#               | 15 $\pm$ 14#§              | 116 $\pm$ 82§              |
| 21          | 230 $\pm$ 187                | 69 $\pm$ 25§               | 140 $\pm$ 57§              |
| 22          | 104 $\pm$ 134                | 0                          | 17 $\pm$ 12                |
| 23          | 40 $\pm$ 38                  | 0                          | 67 $\pm$ 93                |
| 24          | 38 $\pm$ 22                  | 0                          | 12 $\pm$ 8                 |
| 25          | 86 $\pm$ 36*                 | 52 $\pm$ 30                | 40 $\pm$ 17*               |
| 26          | 37 $\pm$ 26                  | 34 $\pm$ 26                | 0                          |
| 27          | 69 $\pm$ 51                  | 0                          | 0                          |
| 28          | 67 $\pm$ 35                  | 59 $\pm$ 14                | 0                          |
| 29          | 103 $\pm$ 35                 | 32 $\pm$ 20§               | 97 $\pm$ 58§               |
| 30          | 179 $\pm$ 99                 | 0                          | 65 $\pm$ 66                |
| 31          | 174 $\pm$ 46#                | 73 $\pm$ 19#               | 102 $\pm$ 38               |
| 32          | 136 $\pm$ 131                | 0                          | 0                          |
| 33          | 238 $\pm$ 63#                | 114 $\pm$ 48#§             | 234 $\pm$ 43§              |
| 34          | 376 $\pm$ 163                | 566 $\pm$ 42§              | 213 $\pm$ 107§#            |
| 35          | 462 $\pm$ 294*               | 0                          | 210 $\pm$ 179*             |

|    |           |            |           |
|----|-----------|------------|-----------|
| 36 | 72±50     | 0          | 139±88    |
| 37 | 10±13     | 0          | 7±8       |
| 38 | 9±7       | 0          | 10±8      |
| 39 | 9±9       | 0          | 9±7       |
| 40 | 57±37     | 0          | 0         |
| 41 | 26±10#    | 64±25#     | 48±21     |
| 42 | 199±116#* | 35±20#     | 83±55*    |
| 43 | 533±203#* | 129±60#§   | 263±137*§ |
| 44 | 42±25     | 0          | 0         |
| 45 | 92±27     | 0          | 0         |
| 46 | 145±49*   | 227±87     | 315±143*  |
| 47 | 39±25     | 51±31§     | 101±42§   |
| 48 | 19±12*    | 27±16      | 54±37*    |
| 49 | 123±141#  | 1284±1151# | 928±983   |
| 50 | 57±30     | 0          | 0         |
| 51 | 91±79#*   | 522±128#   | 485±260*  |
| 52 | 39±37#*   | 270±96#    | 316±351*  |
| 53 | 46±52#*   | 294±103#   | 565±303*  |
| 54 | 93±31*    | 172±111    | 254±214*  |
| 55 | 40±23     | 0          | 18±12     |
| 56 | 48±23     | 0          | 20±11     |
| 57 | 34±23     | 0          | 39±19     |

Protein differences were considered significant when they showed both statistical reliability and, at least, 2 fold change in expression: # Control (Ctrl) vs T0; \* Ctrl vs T1; § T0 vs T1.
