# Supplementary material for: Nusinersen Modulates Proteomics Profiles of Cerebrospinal Fluid in Spinal Muscular Atrophy Type 1 Patients
Source: MDPI journal article supplement (doi:10.3390/ijms22094329), 2021-04-21
Supplement: s1 [file s1]

**Supplementary Table S2:** REVIGO summarized BP GO-terms visualized by bubbles in the REVIGO scatterplot (Fig. 4 in the main text and Supplementary Fig. S1 in Supplementary Material). GO terms are listed grouped in the 7 clusters that were delineated according to term semantical similarity.

| GO terms with neurological implications # | Biological Processes GO terms                                                      | GO identifier     |
|-------------------------------------------|------------------------------------------------------------------------------------|-------------------|
| <b>Metabolism and gene expression</b>     |                                                                                    |                   |
| <b>1</b>                                  | <b>Amyloid precursor protein metabolic process</b>                                 | <b>GO:0042982</b> |
|                                           | Endothelial cell proliferation                                                     | GO:0001935        |
|                                           | ERK1 and ERK2 cascade                                                              | GO:0070371        |
|                                           | Gene expression                                                                    | GO:0010467        |
|                                           | Glucocorticoid metabolic process                                                   | GO:0007186        |
|                                           | Hydrogen peroxide catabolic process                                                | GO:0042744        |
|                                           | Immune system process                                                              | GO:0002376        |
|                                           | Lipid metabolic process                                                            | GO:0006629        |
|                                           | Lipoprotein catabolic process                                                      | GO:0042159        |
|                                           | Negative regulation of cellular protein metabolic process                          | GO:0032269        |
|                                           | Negative regulation of gene expression                                             | GO:0010629        |
|                                           | Negative regulation of hydrolase activity                                          | GO:0051346        |
|                                           | Negative regulation of MAP kinase activity                                         | GO:0043407        |
|                                           | Peptidyl-methionine modification                                                   | GO:0018206        |
| <b>2</b>                                  | <b>Phosphatidylcholine metabolic process</b>                                       | <b>GO:0046470</b> |
|                                           | Phospholipid metabolic process                                                     | GO:0006644        |
|                                           | Positive regulation of cell death                                                  | GO:0010942        |
|                                           | Positive regulation of cholesterol esterification                                  | GO:0010873        |
|                                           | Positive regulation of ERK1 and ERK2 cascade                                       | GO:0070374        |
|                                           | Positive regulation of lipoprotein lipase activity                                 | GO:0051006        |
|                                           | Positive regulation of low-density lipoprotein particle receptor catabolic process | GO:0032805        |
|                                           | Positive regulation of membrane protein ectodomain proteolysis                     | GO:0051044        |
|                                           | Positive regulation of nitric oxide biosynthetic process                           | GO:0045429        |
|                                           | Positive regulation of nitric-oxide synthase activity                              | GO:0051000        |
|                                           | Positive regulation of transcription, DNA-templated                                | GO:0045893        |
|                                           | Post-translational protein modification                                            | GO:0043687        |
|                                           | Protein oxidation                                                                  | GO:0018158        |
|                                           | Purine nucleobase metabolic process                                                | GO:0006144        |
| <b>3</b>                                  | <b>Regulation of amyloid precursor protein catabolic process</b>                   | <b>GO:1902991</b> |
|                                           | Regulation of gene expression                                                      | GO:0010629        |
|                                           | Regulation of lipid metabolic process                                              | GO:0019216        |
| <b>4</b>                                  | <b>Regulation of neuron death</b>                                                  | <b>GO:1901214</b> |
|                                           | Regulation of plasma lipoprotein particle levels                                   | GO:0097006        |

|                                       |                                                                          |                   |
|---------------------------------------|--------------------------------------------------------------------------|-------------------|
|                                       | Regulation of proteasomal protein catabolic process                      | GO:0061136        |
|                                       | Regulation of protein metabolic process                                  | GO:0051246        |
|                                       | Regulation of protein phosphorylation                                    | GO:0001932        |
| 5                                     | <b>Regulation of tau-protein kinase activity</b>                         | <b>GO:1902947</b> |
|                                       | Regulation of transcription by RNA polymerase II                         | GO:0006357        |
|                                       | Response to estrogen                                                     | GO:0043627        |
|                                       | Retinoid metabolic process                                               | GO:0001523        |
|                                       | Steroid metabolic process                                                | GO:0008202        |
|                                       | Triglyceride metabolic process                                           | GO:0006641        |
|                                       | Zymogen activation                                                       | GO:0031638        |
| <b>Macromolecular transport</b>       |                                                                          |                   |
|                                       | Bicarbonate transport                                                    | GO:0015701        |
|                                       | Lipid transport                                                          | GO:0006869        |
|                                       | Lipid transport involved in lipid storage                                | GO:0010877        |
|                                       | Maintenance of location in cell                                          | GO:0051651        |
|                                       | Negative regulation of cholesterol efflux                                | GO:0090370        |
|                                       | Negative regulation of protein secretion                                 | GO:0050709        |
|                                       | Nitric oxide transport                                                   | GO:0030185        |
| 6                                     | <b>NMDA glutamate receptor clustering</b>                                | <b>GO:0097114</b> |
|                                       | Oxygen transport                                                         | GO:0015671        |
|                                       | Platelet degranulation                                                   | GO:0002576        |
|                                       | Positive regulation of endocytosis                                       | GO:0045807        |
| 7                                     | <b>Positive regulation of lipid transport across blood-brain barrier</b> | <b>GO:1903002</b> |
|                                       | Positive regulation of phospholipid efflux                               | GO:1902995        |
|                                       | Protein import                                                           | GO:0017038        |
|                                       | Receptor-mediated endocytosis                                            | GO:0006898        |
|                                       | Thyroid hormone transport                                                | GO:0070327        |
|                                       | Transmembrane transport                                                  | GO:0055085        |
|                                       | Vitamin transport                                                        | GO:0051180        |
| <b>Development and detoxification</b> |                                                                          |                   |
|                                       | Adrenal gland development                                                | GO:0030325        |
|                                       | Animal organ regeneration                                                | GO:0031100        |
|                                       | Artery morphogenesis                                                     | GO:0048844        |
|                                       | Blood coagulation                                                        | GO:0030195        |
|                                       | Cellular oxidant detoxification                                          | GO:0098869        |
|                                       | Circulatory system development                                           | GO:0072359        |
|                                       | Locomotory exploration behavior                                          | GO:0035641        |
| 8                                     | <b>Long-term memory</b>                                                  | <b>GO:0007616</b> |
|                                       | Negative regulation of heterotypic cell-cell adhesion                    | GO:0034115        |

|                                              |                                                                        |            |
|----------------------------------------------|------------------------------------------------------------------------|------------|
| 9                                            | Neuron projection development                                          | GO:0010977 |
| 10                                           | Positive regulation of dendritic spine development                     | GO:0060999 |
|                                              | Positive regulation of substrate adhesion-dependent cell spreading     | GO:1900026 |
| 11                                           | Regulation of beta-amyloid clearance                                   | GO:1900221 |
|                                              | Response to drug                                                       | GO:0042493 |
|                                              | Response to nutrient                                                   | GO:0007584 |
| Signal transduction                          |                                                                        |            |
|                                              | cGMP-mediated signaling                                                | GO:0019934 |
|                                              | G protein-coupled receptor signaling pathway                           | GO:0007186 |
|                                              | Integrin-mediated signaling pathway                                    | GO:0007229 |
|                                              | Negative regulation of canonical Wnt signaling pathway                 | GO:0090090 |
|                                              | Negative regulation of cytokine production involved in immune response | GO:0002719 |
|                                              | Negative regulation of endothelial cell proliferation                  | GO:0001937 |
|                                              | Negative regulation of interleukin-1 beta production                   | GO:0032691 |
|                                              | Negative regulation of response to cytokine stimulus                   | GO:0060761 |
|                                              | Nitric oxide mediated signal transduction                              | GO:0007263 |
|                                              | Positive regulation of Rho protein signal transduction                 | GO:0035025 |
|                                              | Regulation of Cdc42 protein signal transduction                        | GO:0032489 |
|                                              | Signal transduction                                                    | GO:0007165 |
| 12                                           | Synaptic transmission, cholinergic                                     | GO:0007271 |
|                                              | Transforming growth factor beta receptor signaling pathway             | GO:0007179 |
| Biomolecular responses and related processes |                                                                        |            |
|                                              | Acute inflammatory response                                            | GO:0002526 |
|                                              | Acute-phase response                                                   | GO:0006953 |
|                                              | Defense response                                                       | GO:0006952 |
|                                              | Defense response to bacterium                                          | GO:0042742 |
|                                              | Negative chemotaxis                                                    | GO:0050919 |
|                                              | Negative regulation of inflammatory response                           | GO:0050728 |
| 13                                           | Peripheral nervous system axon regeneration                            | GO:0014012 |
| 14                                           | Regulation of behavioral fear response                                 | GO:2000822 |
|                                              | Regulation of innate immune response                                   | GO:0045088 |
|                                              | Response to caloric restriction                                        | GO:0061771 |
|                                              | Response to excess                                                     | GO:0002021 |
|                                              | Response to reactive oxygen species                                    | GO:0000302 |
|                                              | Response to oxidative stress                                           | GO:0006979 |
| Macromolecular assembly and organization     |                                                                        |            |
|                                              | Chylomicron assembly                                                   | GO:0034378 |

|                    |                                                               |                   |
|--------------------|---------------------------------------------------------------|-------------------|
|                    | Chylomicron remodeling                                        | GO:0034371        |
|                    | Cytoskeleton organization                                     | GO:0007010        |
|                    | Extracellular matrix organization                             | GO:0030198        |
| 15                 | <b>Negative regulation of long-term synaptic potentiation</b> | <b>GO:1900272</b> |
| 16                 | <b>Positive regulation of dendritic spine maintenance</b>     | <b>GO:1902952</b> |
| 17                 | <b>Positive regulation of neurofibrillary tangle assembly</b> | <b>GO:1902998</b> |
|                    | Positive regulation of stress fiber assembly                  | GO:0051496        |
| 18                 | <b>Regulation of neuronal synaptic plasticity</b>             | <b>GO:0048168</b> |
|                    | Regulation of protein-containing complex assembly             | GO:0043254        |
|                    | Renal absorption                                              | GO:0070293        |
|                    | Very-low-density lipoprotein particle clearance               | GO:0034447        |
|                    | Virion assembly                                               | GO:0019068        |
| <b>Homeostasis</b> |                                                               |                   |
|                    | Cellular calcium ion homeostasis                              | GO:0006874        |
|                    | Lipid homeostasis                                             | GO:0055088        |
|                    | Phospholipid homeostasis                                      | GO:0055091        |
|                    | Protein stabilization                                         | GO:0050821        |
|                    | Regulation of blood pressure                                  | GO:0008217        |
| 19                 | <b>Regulation of synapse organization</b>                     | <b>GO:0050807</b> |
|                    | Vasodilation                                                  | GO:0042311        |

# Numbers of GO terms with neurological implications match those reported in Supplementary Fig. S1.
